# Supplementary material for: Spatial variability of organic carbon storage and sources in China’s subtropical Halophila beccarii seagrass meadow
Source: Research Square preprint supplement (doi:10.21203/rs.3.rs-7456384/v1), 2025-09-03
Supplement: Supplementary file 1 [file 25bf36b8766713934f04630d.docx]

Supplementary Table 1. The location of sampling sites and the number of samplings

| Transect | Longitude (E) | Latitude (N) | Plants sampling | Sediment core |
| --- | --- | --- | --- | --- |
| Y1 | 116.895162° | 23.542794° | 3 | 3 |
| Y2 | 116.893761° | 23.538133° | 3 | 3 |
| Y3 | 116.897962° | 23.54149° | 3 | 3 |
| Y4 | 116.908557° | 23.540961° | 3 | 3 |
| Y5 | 116.899800° | 23.544429° | 3 | 3 |
| Y6 | 116.905394° | 23.547395° | 1 | 2 |
| Y7 | 116.911773° | 23.547621° | 0 | 3 |
| *Total* | | | 16 | 20 |

Supplementary Table 2. The seagrass characteristics and biomass Corg stocks of *Halophila beccarii* seagrass meadows. Data are presented as minimum, maximum, and mean ± Std.

| **Transects** | **Y1 (N =3)** | **Y2 (N =3)** | **Y3 (N =3)** | **Y4 (N =3)** | **Y5 (N =3)** | **Y6 (N =1)** | **Total (N =16)** |
| --- | --- | --- | --- | --- | --- | --- | --- |
| **Above-ground biomass Corg stocks (****g C m-2)** | 1.19 to 2.44  (2.00 ± 0.70) | 0.98 to 1.88  (1.29 ± 0.52) | 2.01 to 2.67  (2.27 ± 0.35) | 0.16 to 0.72  (0.49 ± 0.30) | 0.03 to 0.19 (0.17 ± 0.13) | 0.78 | 0.03 to 2.67 (1.22 ± 0.93) |
| **Be****low-ground biomass Corg stocks (g C m-2)** | 0.66 to 2.52 (1.67 ± 0.94) | 1.18 to 1.94 (1.46 ± 0.42) | 2.04 to 2.99 (2.53 ± 0.47) | 0.15 to 0.99 (0.59 ± 0.42) | 0.04 to 0.43 (0.23 ± 0.20) | 0.20 | 0.04 to 2.99 (1.12 ± 0.91) |
| **Ratio of above-and below-ground biomass** | 1.36 ± 0.42 | 0.87 ± 0.09 | 0.94 ± 0.32 | 0.91 ± 0.17 | 0.82 ± 0.11 | 3.91 | 0.70 to 3.91  (1.28 ± 0.88) |
| **Biomass Corg stocks (g C m-2)** | 1.84 to 4.89 (3.66 ± 1.60) | 2.18 to 3.82 (2.74 ± 0.94) | 4.56 to 5.13  (4.80 ± 0.30) | 0.30 to 1.71  (1.08 ± 0.72) | 0.07 to 0.39 (0.40 ± 0.33) | 0.98 | 0.07 to 5.13  (2.44 ± 1.85) |
| **Leaf length (****mm)** | 5.3 to 13.3  (8.13 ± 1.85) | 7.1 to 11.2 (8.99 ± 1.41) | 6.8 to 14.24  (8.72 ± 1.80) | 2.3 to 11.88  (8.23 ± 1.78) | 4.36 to 9.12 (6.91 ± 1.48) | 5.52 to 13.6 (9.73 ± 3.08) | 4.36 to 14.24 (8.37 ± 1.82) |
| **Leaf width (mm)** | 1.48 to 3.50  (2.19 ± 0.55) | 1.48 to 3.62  (2.66 ± 0.59) | 2.22 to 3.44  (2.78 ± 0.33) | 1.58 to 3.60  (2.88 ± 0.47) | 1.58 to 3.12 (2.49 ± 1.62) | 2.4 to 3.84 (3.19 ± 0.57) | 1.48 to 3.84  (2.64 ± 0.56) |
| **Shoot height (mm)** | 7.7 to 25.68 (15.87 ± 4.82) | 11.58 to 26.22 (18.09 ± 4.84) | 12.1 to 21.12 (15.81 ± 2.78) | 11.4 to 18.1 (14.78 ± 2.32) | 4.8 to 17.3 (12.16 ± 3.17) | 8.92 to 22.62 (9.73 ± 5.57) | 4.8 to 26.22 (15.67 ± 3.82) |
| **Shoot density**  **(****shoot m-2)** | 13624 to 20626 (18122 ± 3904) | 12987 to 30812 (19056 ± 10183) | 27501 to 39852 (34717 ± 6432) | 1909 to 13369 (7639 ± 5729) | 255 to 5220 (2546 ± 2504) | 3565 | 255 to 39852 (17844 ± 12639) |

Supplementary Table 3. Principal component analysis (PCA) results. PCA among seagrass characteristics, sediment characteristics, and Corg density at *H. beccarii* seagrass meadow (a), *N* = 20) and PCA among sediment characteristics and Corg density (b), *N* = 140). Refer to Figure 5 for abbreviations.

| Principal component analysis (PCA) results (*N*=20) (Figure 7a) | Eigenvalues |  |  |  |  |  |  |  |  |  |
| --- | --- | --- | --- | --- | --- | --- | --- | --- | --- | --- |
|  | **Dim.1** | **Dim.2** | Dim.3 | Dim.4 | Dim.5 | Dim.6 | Dim.7 | Dim.8 | Dim.9 |
| Variance | **10.28** | **5.45** | 1.52 | 0.81 | 0.77 | 0.31 | 0.25 | 0.21 | 0.16 |
| % of var. | **51.41** | **27.23** | 7.61 | 4.05 | 3.85 | 1.57 | 1.25 | 1.04 | 0.80 |
| Cumulative % of var. | **51.41** | **78.65** | 86.26 | 90.31 | 94.15 | 95.73 | 96.98 | 98.02 | 98.82 |
| Variables | (10 first) |  |  |  |  |  |  |  |  |
|  | Dim.1 | ctr | cos2 | Dim.2 | ctr | cos2 | Dim.3 | ctr | cos2 |
| Cov. | **-0.89** | **7.75** | **0.80** | -0.20 | 0.71 | 0.04 | 0.23 | 3.52 | 0.05 |
| LeafL. | 0.36 | 1.23 | 0.13 | **0.82** | **12.43** | 0.68 | 0.37 | 9.07 | 0.14 |
| LeafW. | 0.16 | 0.25 | 0.03 | 0.35 | 2.19 | 0.12 | 0.87 | 49.68 | 0.76 |
| ShootH. | 0.36 | 1.27 | 0.13 | **0.82** | **12.26** | 0.67 | 0.22 | 3.29 | 0.05 |
| ShootD. | -0.59 | 3.33 | 0.34 | **0.69** | **8.78** | 0.48 | 0.02 | 0.02 | 0.00 |
| A.ground.C | -0.24 | 0.55 | 0.06 | **0.91** | **15.14** | 0.82 | -0.22 | 3.28 | 0.05 |
| B.ground.C | **-0.81** | **6.44** | **0.66** | 0.46 | 3.83 | 0.21 | -0.10 | 0.60 | 0.01 |
| A.B | **0.78** | **5.97** | **0.61** | 0.41 | 3.15 | 0.17 | 0.12 | 0.87 | 0.01 |
| Moi. | **0.88** | **7.48** | **0.77** | 0.35 | 2.26 | 0.12 | -0.20 | 2.52 | 0.04 |
| DBD | -0.41 | 1.63 | 0.17 | -0.74 | 9.94 | 0.54 | -0.01 | 0.01 | 0.00 |
| Principal component analysis (PCA) results (*N*=140) (Figure 7b) | Eigenvalues | **Dim.1** | **Dim.2** | Dim.3 | Dim.4 | Dim.5 | Dim.6 | Dim.7 | Dim.8 | Dim.9 |
| Variance | **5.23** | **1.83** | 0.93 | 0.41 | 0.29 | 0.14 | 0.09 | 0.05 | 0.03 |
| % of var. | **58.16** | **20.34** | 10.29 | 4.54 | 3.25 | 1.53 | 1.04 | 0.53 | 0.31 |
| Cumulative % of var. | **58.16** | **78.50** | 88.80 | 93.33 | 96.58 | 98.12 | 99.16 | 99.69 | 100.00 |
| Variables | (10 first) |  |  |  |  |  |  |  |  |
|  | Dim.1 | ctr | cos2 | Dim.2 | ctr | cos2 | Dim.3 | ctr | cos2 |
| Moi. | **0.88** | **14.76** | **0.77** | -0.38 | 7.82 | 0.14 | 0.08 | 0.62 | 0.01 |
| Sal. | **0.89** | **14.97** | **0.78** | -0.05 | 0.15 | 0.00 | 0.05 | 0.31 | 0.00 |
| pH | 0.12 | 0.26 | 0.01 | 0.41 | 8.98 | 0.16 | 0.90 | 87.49 | 0.81 |
| DBD | -0.39 | 2.83 | 0.15 | **0.83** | **37.46** | **0.69** | -0.06 | 0.39 | 0.00 |
| Corg.den. | **0.69** | **9.13** | **0.48** | **0.63** | **21.64** | **0.40** | -0.20 | 4.25 | 0.04 |
| %CaCO3 | **0.93** | **16.57** | **0.87** | -0.07 | 0.29 | 0.01 | 0.08 | 0.68 | 0.01 |
| %LOI | **0.97** | **17.80** | **0.93** | -0.09 | 0.43 | 0.01 | 0.01 | 0.01 | 0.00 |
| %Corg | **0.97** | **17.80** | **0.93** | 0.01 | 0.00 | 0.00 | -0.06 | 0.37 | 0.00 |
| δ13C | **-0.56** | **5.90** | **0.31** | **-0.65** | **23.22** | **0.43** | 0.23 | 5.88 | 0.05 |

Supplementary Table 4. Contribution percentage of Corg from three different sources at different depth

| Depth (cm) | δ13C (‰, *N* =7) | Terrigenous Corg (%) | Seagrass Corg (%) | Phytoplankton Corg (%) |
| --- | --- | --- | --- | --- |
| 0 to 10 | −25.96 ± 3.82 | 46.00 ± 20.00 | 28.90 ± 20.40 | 25.10 ± 18.40 |
| 10 to 20 | −25.96 ± 1.43 | 50.00 ± 21.60 | 26.60 ± 19.90 | 23.40 ± 18.70 |
| 20 to 30 | −26.23 ± 1.64 | 51.30 ± 22.60 | 26.20 ± 19.90 | 22.50 ± 18.30 |
| 30 to 40 | −25.95 ± 1.77 | 49.50 ± 22.00 | 27.10 ± 20.20 | 23.40 ± 18.40 |
| 40 to 50 | −26.25 ± 1.45 | 51.40 ± 22.60 | 26.10 ± 19.80 | 22.50 ± 18.40 |
| 50 to 70 | −26.40 ± 1.04 | 53.10 ± 23.00 | 24.90 ± 18.50 | 22.00 ± 18.50 |
| 70 to 100 | −25.63 ± 1.28 | 47.60 ± 20.80 | 28.00 ± 20.10 | 24.40 ± 18.80 |
| Average | −26.00 ± 1.50 | 49.84 ± 23.57 | 26.83 ± 21.43 | 23.33 ± 19.98 |
